# Supplementary material
Source: Springer Nature journal article supplement (https://www.springermedizin.de/resource/supplementary/12876_2008_306_MOESM2_ESM.pdf/9439132)

**All cases**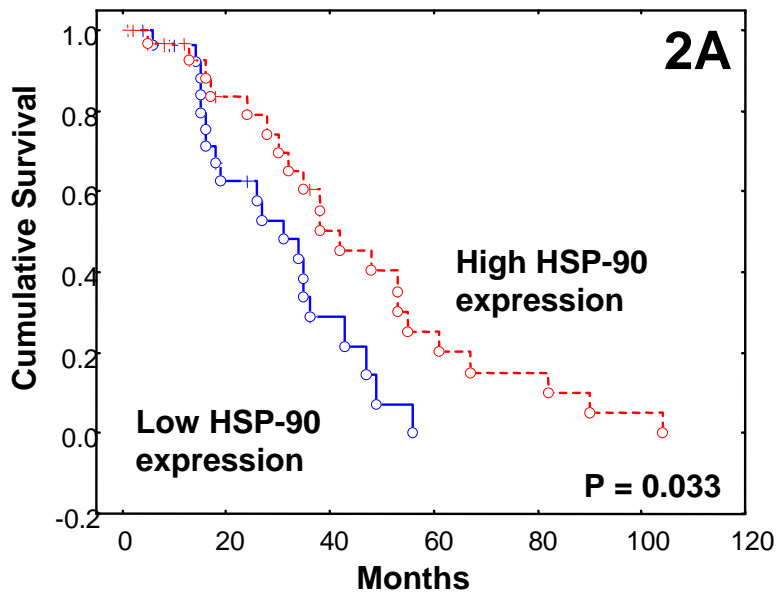**pN0 cases**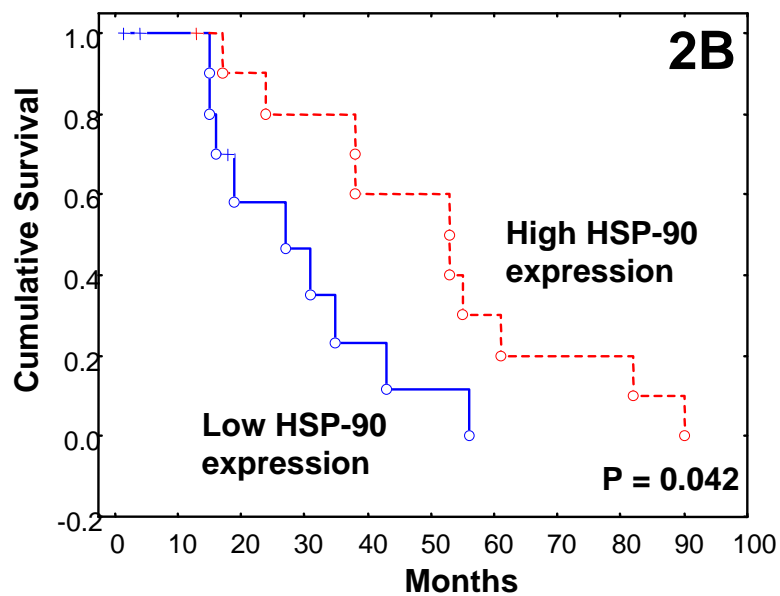**G1/G2 cases**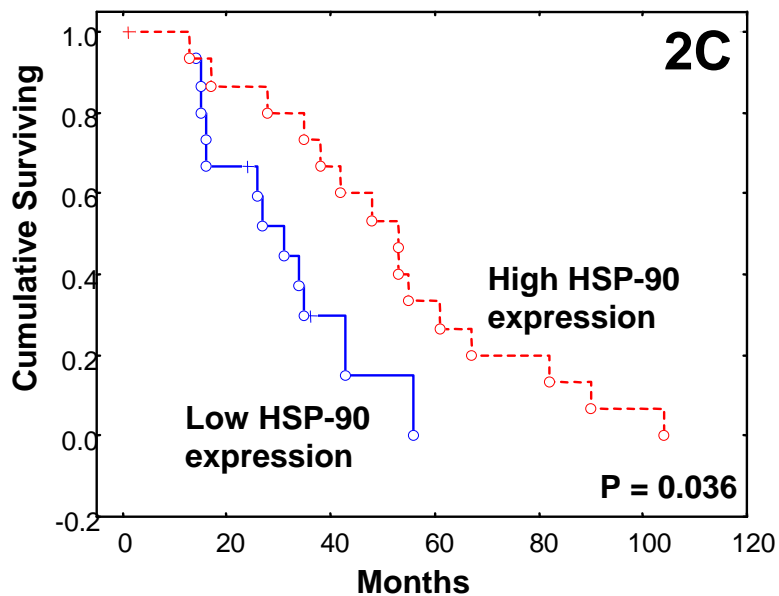**pM0 cases**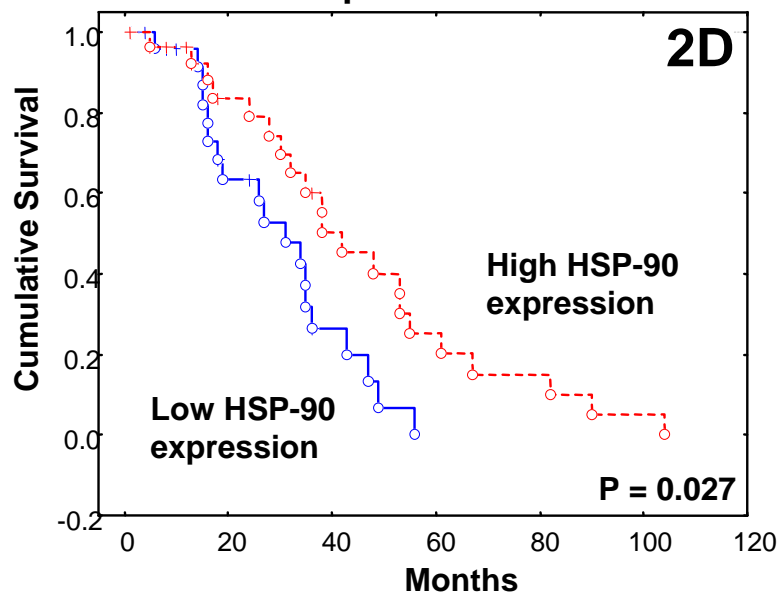

Supplement: MOESM2 [file 9439132]
